# Supplementary material for: CD163+ tumor‐associated macrophage accumulation in breast cancer patients reflects both local differentiation signals and systemic skewing of monocytes
Source: PubMed Central journal article supplement (PMC7017151; doi:10.1002/cti2.1108), 2020-02-13

# Suppl. Figure 1

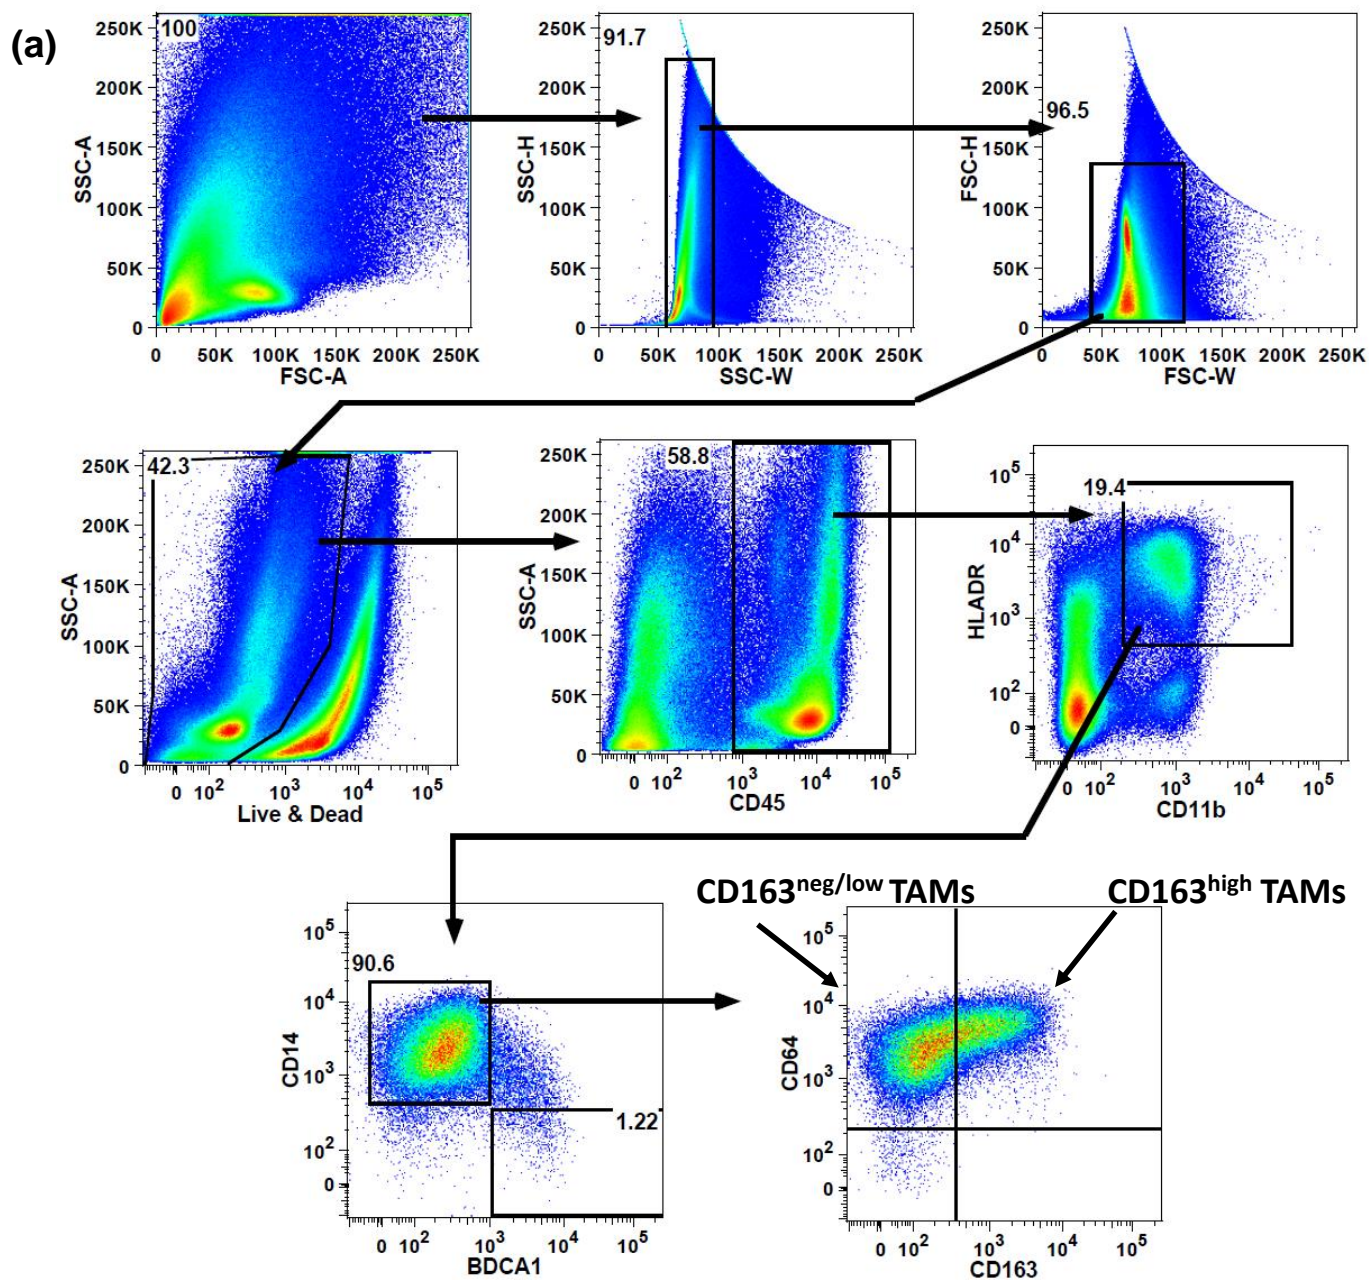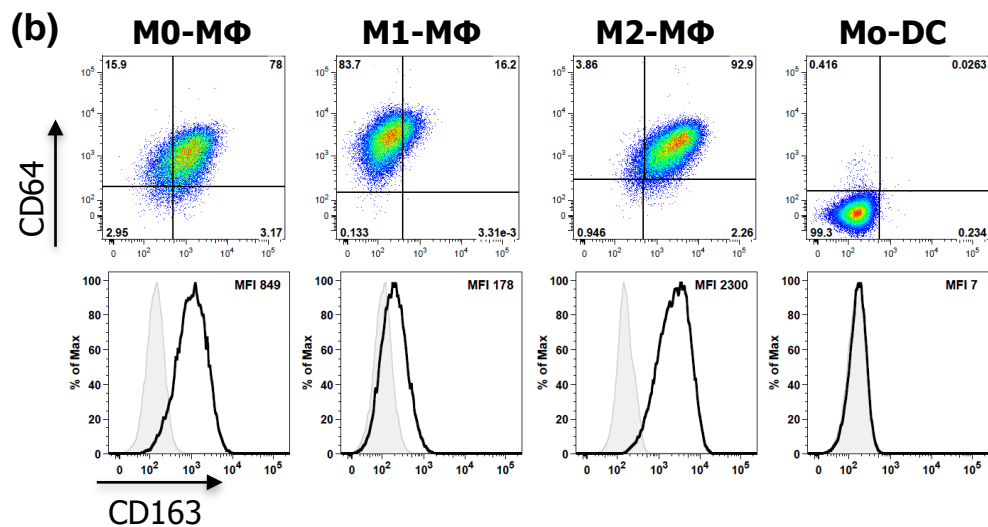

Supplement: CTI2-9-e1108-s001.pdf [file CTI2-9-e1108-s001.pdf]
