# Supplementary material for: CD163+ tumor‐associated macrophage accumulation in breast cancer patients reflects both local differentiation signals and systemic skewing of monocytes
Source: PubMed Central journal article supplement (PMC7017151; doi:10.1002/cti2.1108), 2020-02-13
Supplement: CTI2-9-e1108-s002.pdf [file CTI2-9-e1108-s002.pdf]

# Suppl. Figure 2

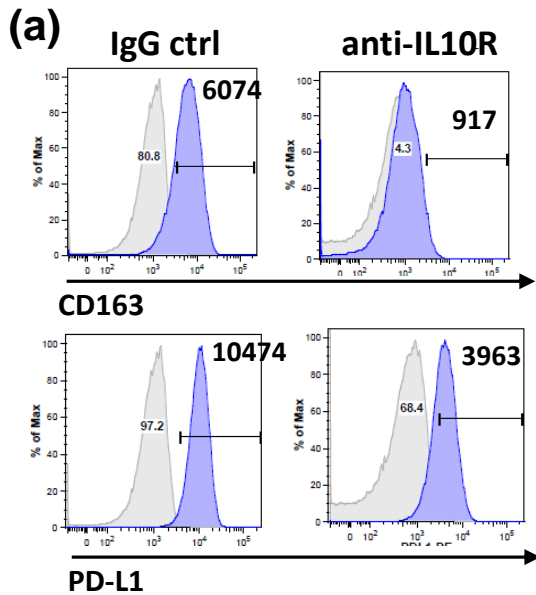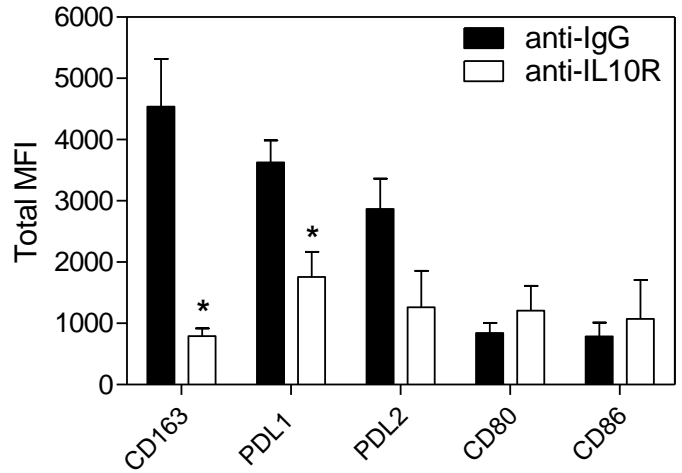

(b)

| SNDil content | SNDil-MΦ phenotype |                                              |                                                |
|---------------|--------------------|----------------------------------------------|------------------------------------------------|
|               | Cytokines (pg/ml)  | CD163 <sup>low</sup><br>IL-10 <sup>low</sup> | CD163 <sup>high</sup><br>IL-10 <sup>high</sup> |
| CCL2          |                    | 209 ± 163                                    | 374 ± 212                                      |
| M-CSF         |                    | 93.5 ± 47                                    | 367 ± 144                                      |
| TGF-β1        |                    | 796 ± 190                                    | 1014 ± 187                                     |
| TGF-β3        |                    | 23 ± 4.1                                     | 35 ± 6.2                                       |
| VEGF          |                    | 1,791 ± 966.7                                | 4,864 ± 2,885                                  |
