# Supplementary material for: CD163+ tumor‐associated macrophage accumulation in breast cancer patients reflects both local differentiation signals and systemic skewing of monocytes
Source: PubMed Central journal article supplement (PMC7017151; doi:10.1002/cti2.1108), 2020-02-13
Supplement: CTI2-9-e1108-s004.pdf [file CTI2-9-e1108-s004.pdf]

**Supplementary Table 1 - Clinical characteristics of BC patients used for Flow Cytometry analysis**

|                    |         | n              | ratio <1<br>CD163high/163low | ratio ≥1<br>CD163high/163low |
|--------------------|---------|----------------|------------------------------|------------------------------|
| age                | <50     | 27 (29%)       | 19 (70,3%)                   | 8 (29,6%)                    |
|                    | ≥50     | 66 (71%)       | 47 (71,2%)                   | 19 (28,8%)                   |
| menopause          | NA      | 3 (3,2%)       |                              |                              |
|                    | no      | 24 (25,8%)     | 16 (66,6%)                   | 8 (33,3%)                    |
|                    | yes     | 66<br>(70,96%) | 47 (71,2%)                   | 19 (28,8%)                   |
| histology          | ductal  | 66 (71%)       | 49 (74,4%)                   | 17 (25,75%)                  |
|                    | lobular | 20 (21,5%)     | 14 (70%)                     | 6 (30%)                      |
|                    | mixte   | 3 (3,2%)       | 2 (66,6%)                    | 1 (33,3%)                    |
|                    | others  | 4 (4,3%)       | 1 (25%)                      | 3 (75%)                      |
| SBR                | 1       | 2 (2,1%)       | 2 (100%)                     | 0                            |
|                    | 2       | 42 (45,1%)     | 29 (69%)                     | 13 (30,9%)                   |
|                    | 3       | 49 (52,7%)     | 35 (71%)                     | 14 (28,5%)                   |
| N+                 | no      | 53 (57%)       | 36 (67,9%)                   | 17 (32%)                     |
|                    | yes     | 37 (43%)       | 29 (78,3%)                   | 8 (21,6%)                    |
| Neadj<br>treatment | no      | 82 (88,2%)     | 60 (73%)                     | 22 (26,8%)                   |
|                    | yes     | 11 (11,8%)     | 6 (54%)                      | 5 (45%)                      |
| ER+                | no      | 24 (25,8%)     | 18 (75%)                     | 6 (25%)                      |
|                    | yes     | 69 (74,2%)     | 48 (69,5%)                   | 21 (30,4%)                   |
| PgR+               | no      | 31 (33,3%)     | 23 (74,1%)                   | 8 (25,8%)                    |
|                    | yes     | 62 (66,6%)     | 43 (69,3%)                   | 19 (30,6%)                   |
| Her2               | no      | 77 (82,8%)     | 53 (68,8%)                   | 24 (31,1%)                   |
|                    | yes     | 16 (17,2%)     | 13 (81,25%)                  | 3 (18,75%)                   |
| TNBT               | no      | 76 (81,7%)     | 53 (69%)                     | 23 (30%)                     |
|                    | yes     | 17 (18,3%)     | 13 (76%)                     | 4 (23%)                      |
| Relapse            | no      | 71 (76,3%)     | 48 (67%)                     | 23 (32%)                     |
|                    | yes     | 22 (23,7%)     | 18 (81%)                     | 4 (18%)                      |
