# Supplementary material for: CD163+ tumor‐associated macrophage accumulation in breast cancer patients reflects both local differentiation signals and systemic skewing of monocytes
Source: PubMed Central journal article supplement (PMC7017151; doi:10.1002/cti2.1108), 2020-02-13
Supplement: CTI2-9-e1108-s005.pdf [file CTI2-9-e1108-s005.pdf]

**Supplementary Table 2 : Clinical characteristics of BC patients enrolled in the IHC study**

|                               | N (%)         |     | CD163          |                    | p value |
|-------------------------------|---------------|-----|----------------|--------------------|---------|
|                               |               |     | 0              | 1-2                |         |
|                               | N             | 238 | 109            | 129                |         |
| <b>Age (Years)</b>            |               |     |                |                    | 0,143   |
| median                        | 57(27,3-87,4) |     | 57 (27,3 87,4) | 56.8 (30,4 - 82,7) |         |
| <50                           | 77 (32,4)     |     | 30 (27,5)      | 47 (37,1)          |         |
| >50                           | 161 (67,6)    |     | 79 (72,5)      | 82 (62,9)          |         |
| <b>Tumor size (mm)</b>        |               |     |                |                    | 0,145   |
| <30                           | 152 (63,9)    |     | 75 (68,8)      | 77 (59,7)          |         |
| ≥ 30                          | 86 (36,1)     |     | 34 (31,2)      | 52 (40,3)          |         |
| <b>Menopause</b>              |               |     |                |                    | 0,071   |
| Unknown                       | 3             |     | 3              | 0                  |         |
| No                            | 81 (34,5)     |     | 30 (28,3)      | 51 (40,5)          |         |
| Yes                           | 154 (65,5)    |     | 76 (71,7)      | 78 (59,5)          |         |
| <b>SBR grade</b>              |               |     |                |                    | <0,001  |
| 1                             | 38 (16)       |     | 30 (27,5)      | 8 (6,9)            |         |
| 2                             | 99 (41,6)     |     | 53 (46,8)      | 46 (37,9)          |         |
| 3                             | 101 (42,4)    |     | 26 (23,9)      | 75 (55,2)          |         |
| <b>Lymph node involvement</b> |               |     |                |                    | 0,003   |
| unknown                       | 1             |     | 0              | 1                  |         |
| no                            | 87 (36,7)     |     | 51 (46,8)      | 36 (27)            |         |
| yes                           | 150 (63,3)    |     | 58 (53,2)      | 92 (73)            |         |
| <b>Lymphatic emboles</b>      |               |     |                |                    | 0,002   |
| No                            | 118 (49,6)    |     | 66 (60,6)      | 52 (40,3)          |         |
| Yes                           | 120 (50,4)    |     | 43 (39,4)      | 77 (59,7)          |         |
| <b>Molecular subtypes</b>     |               |     |                |                    | <0,001  |
| Unknown                       | 11            |     | 6              | 5                  |         |
| Luminal A                     | 116 (51,1)    |     | 74 (71,8)      | 42 (36,9)          |         |
| Luminal B                     | 85 (7,4)      |     | 24 (23,3)      | 61 (50,5)          |         |
| Her2/neu amplified            | 6 (2,6)       |     | 2 (1,9)        | 4 (2,7)            |         |
| Triple Negative               | 20 (8,8)      |     | 3 (2,9)        | 17 (9,9)           |         |
